# Supplementary material for: Psychiatric Disorders Are Associated with Increased Risk of Sepsis Following a Cancer Diagnosis
Source: Oxford University Press journal article supplement (doi:10.1158/0008-5472.can-20-0502), 2020-06-12
Supplement: 00085472can200502-sup-237398_2_supp_6338876_qbfyl7.docx [file 00085472can200502-sup-237398_2_supp_6338876_qbfyl7.docx]

**Table S1: ICD-10 codes for cancer.**

|  | **ICD 10** |
| --- | --- |
| **All cancers** | **C00-C97, D45, D46, D471, D473** |
| **Central nervous system (CNS) cancer** | **C70-C72** |
| **Breast cancer** | **C50** |
| **Colorectal cancer** | **C18-C20** |
| **Lung cancer** | **C34** |
| **Prostate cancer** | **C61** |
| **Non-melanoma skin cancer** | **C44** |
| **Hematological malignancy** | **C81-C96, D45, D46, D471, D473** |
| **Others** | **All cancers except above** |

**Table S2: ICD-10 codes for sepsis and infection.**

|  | **ICD 10** |
| --- | --- |
| **Sepsis†** | **A02.1, A04.0-A04.3, A39–A41, A42.7, A48, A90–A99, B37.7, B38.7, B39.3, B40.7, B41.7, B42.7, B44.7, B45.7, B46.4, B95–B99, D65, and T80.2** |
| **Any infection*** | **A00-B99, D65, G00-G02, G04-G05, H000, H010, H030, H031, H061, H60, H65-H67, I301, I33, I400, J00-J06, J09-J18, J20-J22, K29, K35-K37, L01-L08, M00, M01, M600, M86, N080, N10, N300, N390, N70, N72-N74, N751, N760-N764, N771, T802** |

†The codes of sepsis include Salmonella septicaemia, enteropathogenic Escherichia coli infection, enterotoxigenic Escherichia coli infection, enteroinvasive Escherichia coli infection, enterohaemorrhagic Escherichia coli infection, Meningococcal infection, Streptococcal septicaemia, Actinomycotic septicaemia, gas gangrene, Legionnaires' disease, nonpneumonic Legionnaires' disease, toxic shock syndrome, Brazilian purpuric fever, other specified bacterial diseases, arthropod-borne viral fevers and viral haemorrhagic fevers, Candidal septicaemia, disseminated coccidioidomycosis, disseminated histoplasmosis capsulati, disseminated blastomycosis, disseminated paracoccidioidomycosis, disseminated sporotrichosis, disseminated aspergillosis, disseminated cryptococcosis, disseminated mucormycosis, disseminated intravascular coagulation, infections following infusion, transfusion and therapeutic injection, infection of other bacterial, viral and other infectious agents, other infected diseases and other septicaemia.

*The codes of any infection include infections of respiratory tract, infections of skin, infections of gastrointestinal tract, infections of urinary tract, infections of neurological system and eye, infections of the circulatory system, infections of the musculoskeletal system and connective tissue, sexually transmitted and reproductive tract infections, and other infections.
